# Supplementary material
Source: publisher figshare collection journal article supplement (https://acs.figshare.com/ndownloader/files/22124784)

**Supplementary Information of**

**Occurrence of cerium-, titanium- and silver-bearing**

**nanoparticles in the Besòs and Ebro Rivers**

Josep Sanchís<sup>1,2,3,\*</sup>, Javier Jiménez-Lamana<sup>4</sup>, Esteban Abad<sup>1</sup>, Joanna Szpunar<sup>4</sup> and  
Marinella Farré<sup>1</sup>

<sup>1</sup>. Water and Soil Quality Research Group, Institute of Environmental Assessment and Water Research (IDAEA- CSIC), C/Jordi Girona, 18-26, 08034, Barcelona, Catalonia, Spain.

<sup>2</sup>. Catalan Institute for Water Research (ICRA), Scientific and Technological Park of the University of Girona, H2O Building, C/Emili Grahit, 101, E17003, Girona, Catalonia, Spain.

<sup>3</sup>. University of Girona, 17071, Girona, Catalonia, Spain.

<sup>4</sup>. Laboratoire de Chimie Analytique Bio-inorganique et Environnement (LCABIE), UMR 5254-IPREM, CNRS-UPPA, Hélioparc, Pau, France.

\*corresponding author: [jsanchis@icra.cat](mailto:jsanchis@icra.cat)

**Figure S1.** Example of size distribution of Ce-, Ti- and Ag-NPs determined in a WWTP from the Barcelona catchment area.

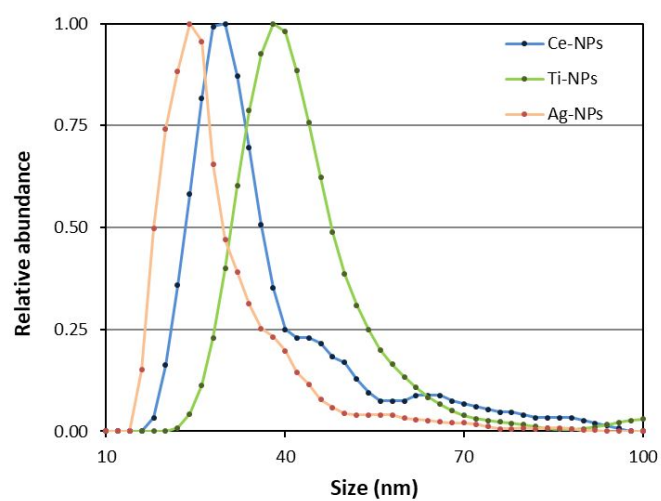

**Figure S2.** Size distribution of Ce-, Ti- and Ag-NPs as determined in the four samples from the Besòs River basin.

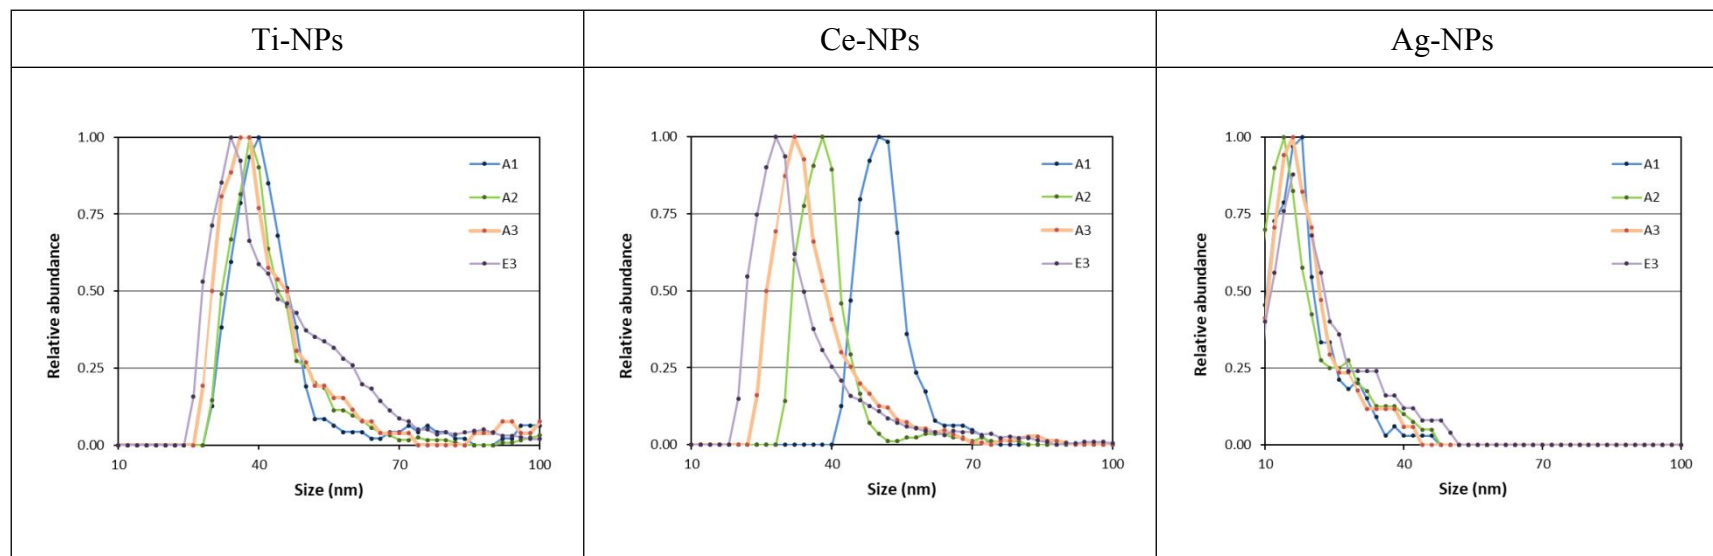

Supplement: Supplementary file 1 [file 22124784]
